# Supplementary material for: Penehyclidine Hydrochloride Pretreatment Ameliorates Rhabdomyolysis-Induced AKI by Activating the Nrf2/HO-1 Pathway and Allevi-ating Endoplasmic Reticulum Stress in Rats
Source: PubMed Central journal article supplement (PMC4795801; doi:10.1371/journal.pone.0151158), 2016-03-17
Supplement: pone.0151158.s001.pdf [file pone.0151158.s001.pdf]

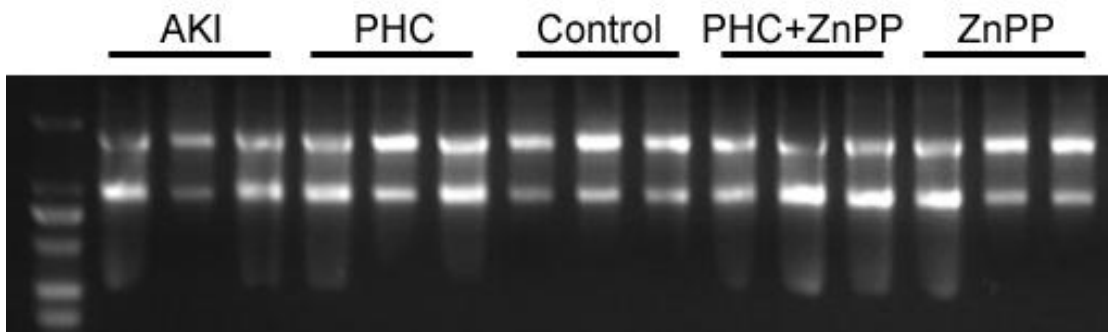

**Fig. A.** Electrophoretogram of total RNA extracted from renal tissues.

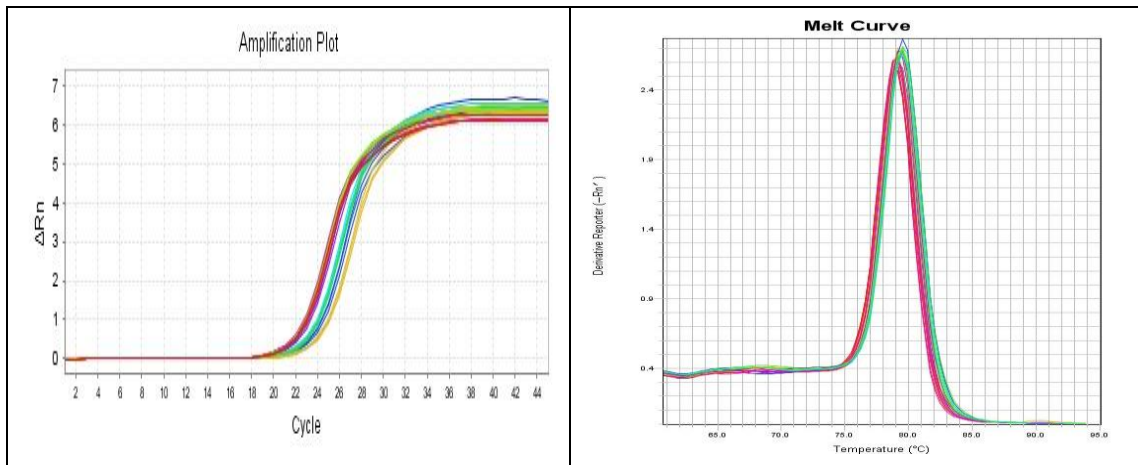

**Fig. B.** The amplification curve and melt curve of GRP78 mRNA.

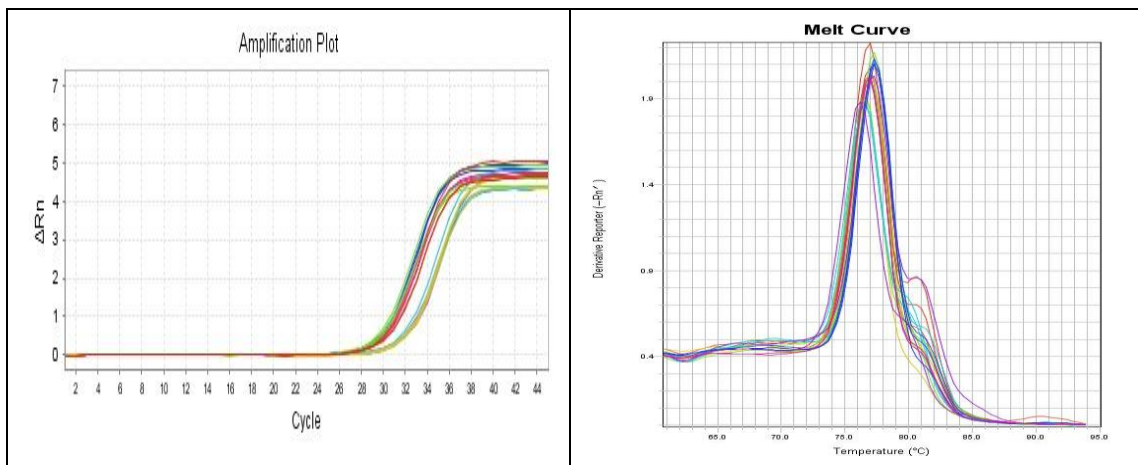

**Fig. C.** The amplification curve and melt curve of caspase-12 mRNA.

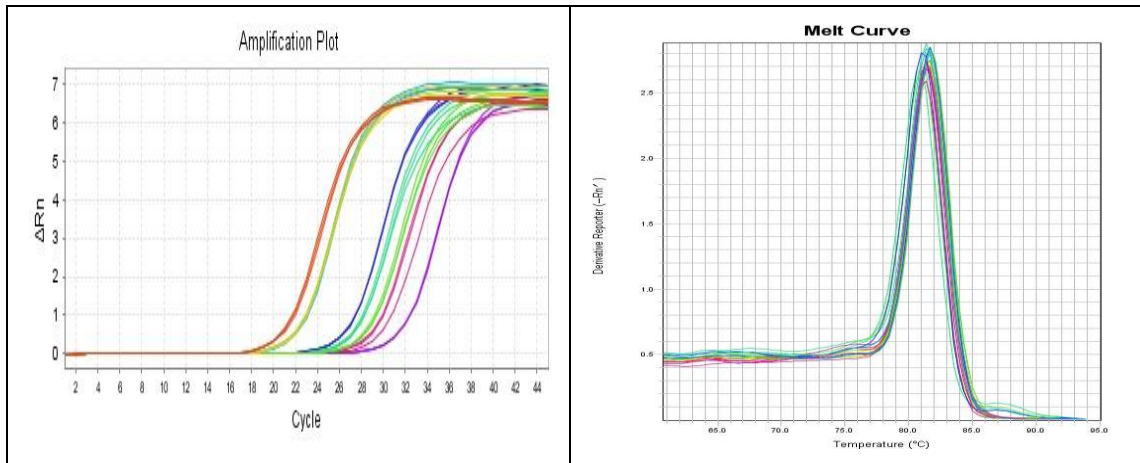

**Fig. D.** The amplification curve and melt curve of HO-1 mRNA.

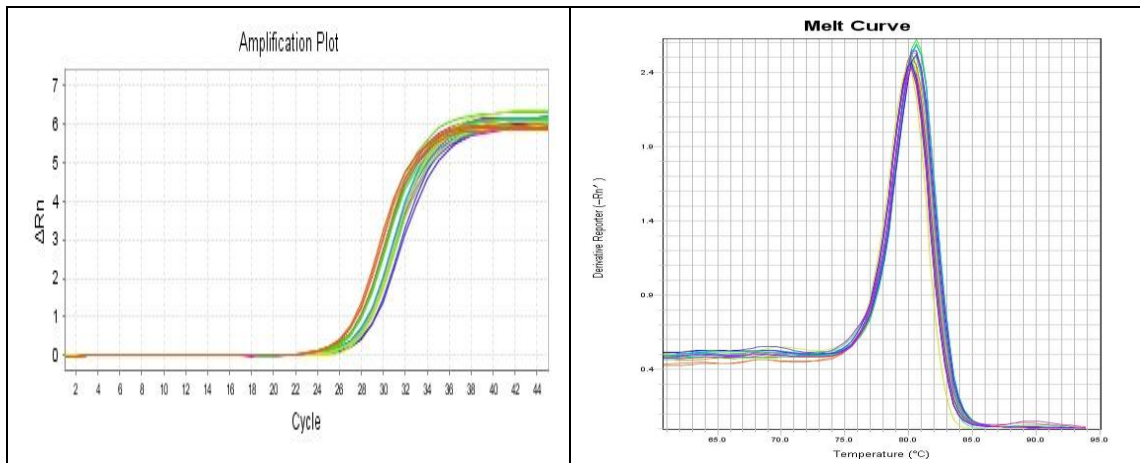

**Fig. E.** The amplification curve and melt curve of Nrf2 mRNA.

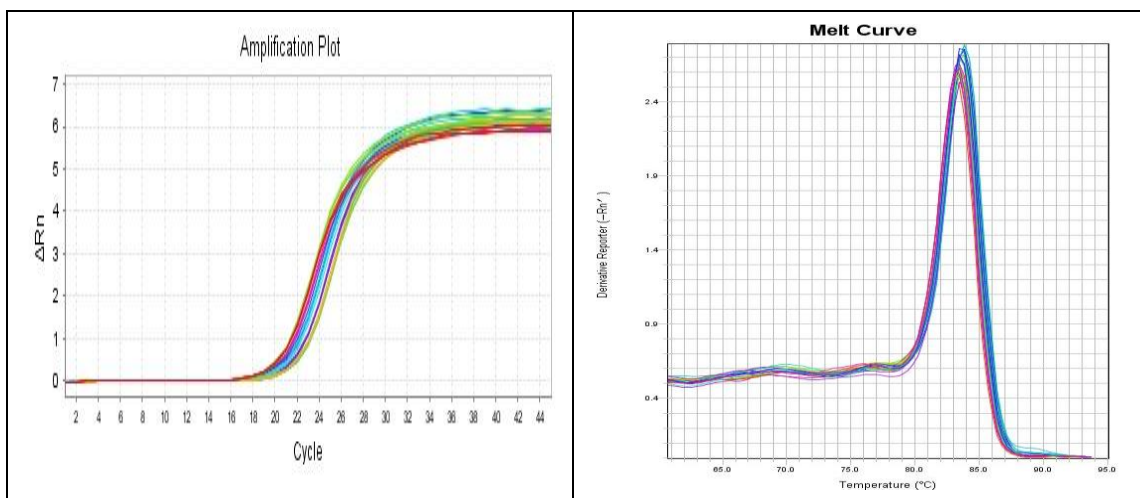

**Fig. F.** The amplification curve and melt curve of GAPDH mRNA.
